# Supplementary material for: Probiotic Supplement Preparation Relieves Test Anxiety by Regulating Intestinal Microbiota in College Students
Source: Hindawi journal article supplement (doi:10.1155/2021/5597401), 2021-04-20
Supplement: f1 [file 5597401.f1.pdf]

Figure S1

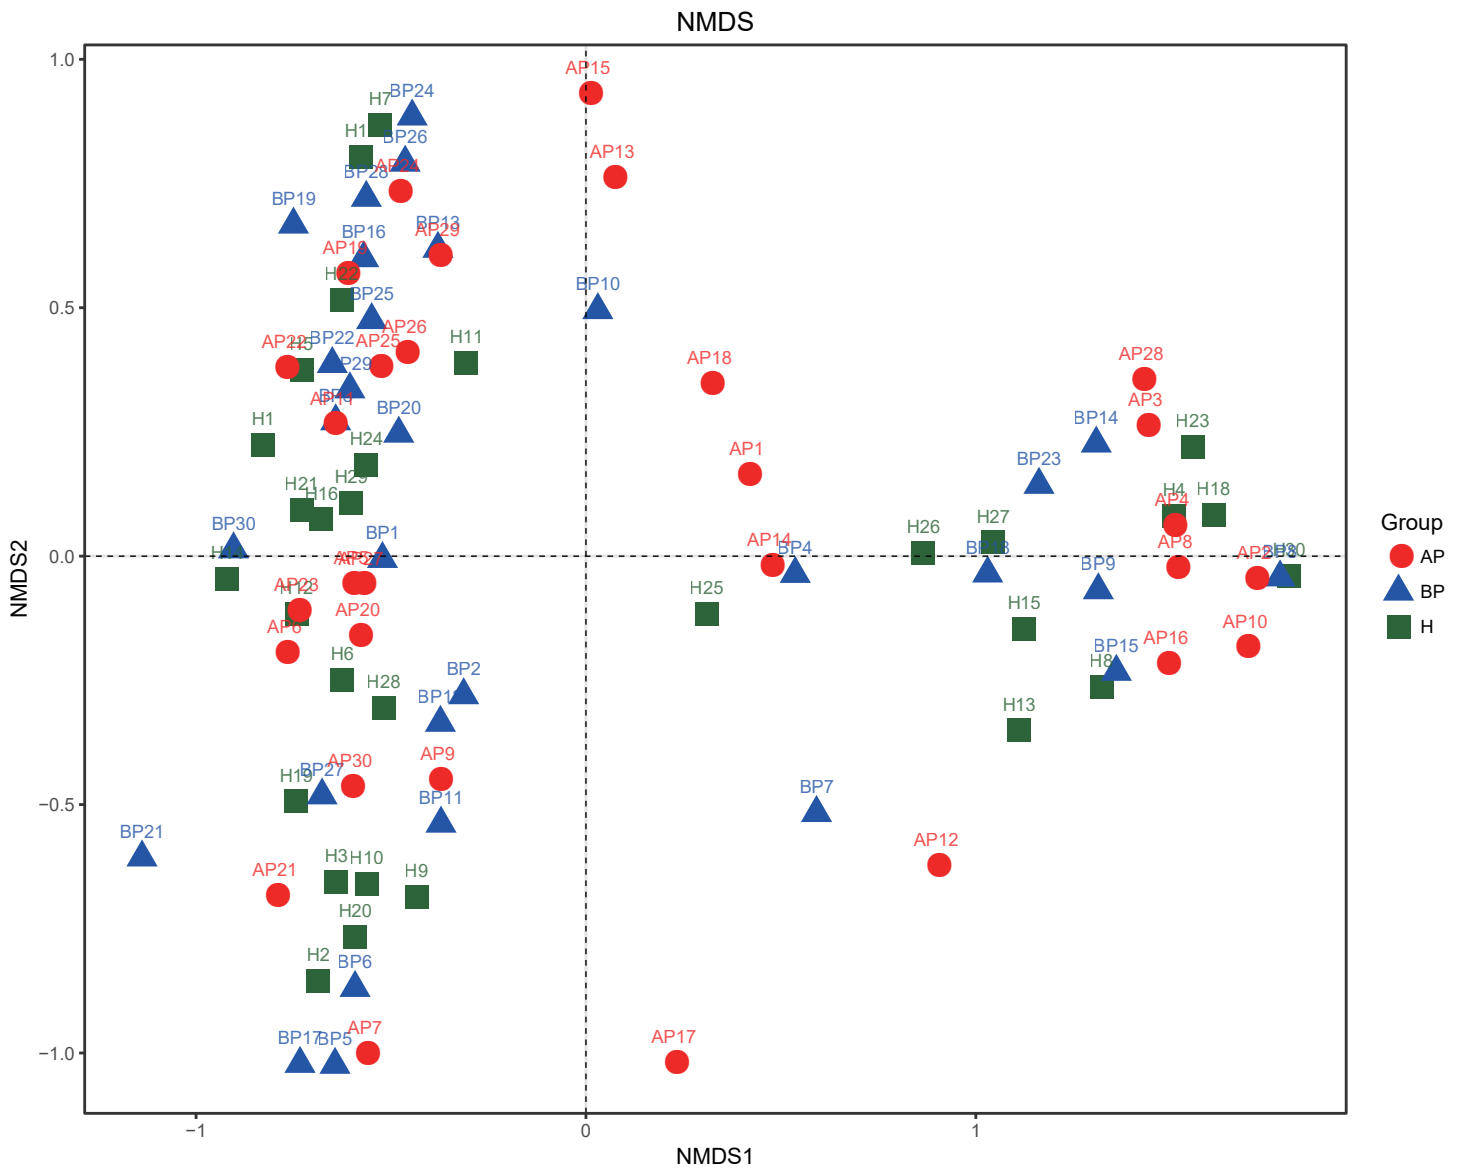

Figure S1: Nonmetric Multidimensional Scaling (NMDS) analysis of shared genera among microbiomes in the H, BP, and AP groups.
