# Supplementary material for: Probiotic Supplement Preparation Relieves Test Anxiety by Regulating Intestinal Microbiota in College Students
Source: Hindawi journal article supplement (doi:10.1155/2021/5597401), 2021-04-20
Supplement: f2 [file 5597401.f2.doc]

Table S1: Baseline patient demographics and characteristics

| **Variable** | **Health Group** | **Treatment Group** |
| --- | --- | --- |
| **Total members of enrollment** | 60 | 60 |
| **Male: female (n: n) #** | 1:1(30.00:30.00) | 1:1 (30.00:30.00) |
| **HAMD score (mean** [**±**](http://www.baidu.com/link?url=pNuyEeISk8YpQJxPLZAC2SnfjooCbiBnjpFlCJYGXeRdeCq1Xpc_1JNCe9ER4qEoHRHXet9KpIhnH2gHoolZiJCgD0_0pYn0Ya8qLKnDxAq) **SD) a** | 0-6 (1.92 [±](http://www.baidu.com/link?url=pNuyEeISk8YpQJxPLZAC2SnfjooCbiBnjpFlCJYGXeRdeCq1Xpc_1JNCe9ER4qEoHRHXet9KpIhnH2gHoolZiJCgD0_0pYn0Ya8qLKnDxAq) 1.49) | 8-20 (10.95 [±](http://www.baidu.com/link?url=pNuyEeISk8YpQJxPLZAC2SnfjooCbiBnjpFlCJYGXeRdeCq1Xpc_1JNCe9ER4qEoHRHXet9KpIhnH2gHoolZiJCgD0_0pYn0Ya8qLKnDxAq) 3.95) ** |
| **HAMA score (mean** [**±**](http://www.baidu.com/link?url=pNuyEeISk8YpQJxPLZAC2SnfjooCbiBnjpFlCJYGXeRdeCq1Xpc_1JNCe9ER4qEoHRHXet9KpIhnH2gHoolZiJCgD0_0pYn0Ya8qLKnDxAq) **SD) b** | 0-7 (1.97 [±](http://www.baidu.com/link?url=pNuyEeISk8YpQJxPLZAC2SnfjooCbiBnjpFlCJYGXeRdeCq1Xpc_1JNCe9ER4qEoHRHXet9KpIhnH2gHoolZiJCgD0_0pYn0Ya8qLKnDxAq) 2.01) | 8-36 (11.55 [±](http://www.baidu.com/link?url=pNuyEeISk8YpQJxPLZAC2SnfjooCbiBnjpFlCJYGXeRdeCq1Xpc_1JNCe9ER4qEoHRHXet9KpIhnH2gHoolZiJCgD0_0pYn0Ya8qLKnDxAq) 5.48) ** |
| **Age (mean** [**±**](http://www.baidu.com/link?url=pNuyEeISk8YpQJxPLZAC2SnfjooCbiBnjpFlCJYGXeRdeCq1Xpc_1JNCe9ER4qEoHRHXet9KpIhnH2gHoolZiJCgD0_0pYn0Ya8qLKnDxAq) **SD)** | 19.85 [±](http://www.baidu.com/link?url=pNuyEeISk8YpQJxPLZAC2SnfjooCbiBnjpFlCJYGXeRdeCq1Xpc_1JNCe9ER4qEoHRHXet9KpIhnH2gHoolZiJCgD0_0pYn0Ya8qLKnDxAq) 0.11 | 19.30 [±](http://www.baidu.com/link?url=pNuyEeISk8YpQJxPLZAC2SnfjooCbiBnjpFlCJYGXeRdeCq1Xpc_1JNCe9ER4qEoHRHXet9KpIhnH2gHoolZiJCgD0_0pYn0Ya8qLKnDxAq) 0.05 |

a The 17-item Hamilton Depression Rating Scale (HAMD-17) was used to evaluate the depressive symptoms among students.

b The 14-item Hamilton Anxiety Scale (HAMA-14) was used to assess the anxiety symptoms.

# means the numbers of male and female, ** *p*<0.01

Table S2: The unique bacteria existed in the test anxious students before taking PSP

| OTU ID | Taxonomy |
| --- | --- |
| otu33056 | Unclassified_Lachnospiraceae |
| otu45512 | Unclassified_Dialister |
| otu63976 | Unclassified_Fusobacterium |
| otu26462 | Unclassified_Dialister |
| otu36214 | Unclassified_Bacteroides |
| otu45334 | Unclassified_Lachnospiraceae |
| otu769 | Unclassified_Roseburia |
| otu37041 | Bacteroides_plebeius |
| otu58227 | Prevotella_copri |
| otu34692 | Unclassified_Phascolarctobacterium |
| otu14384 | Unclassified_Clostridiales |
| otu42220 | Unclassified_[Mogibacteriaceae] |
| otu2201 | Unclassified_[Prevotella] |
| otu16253 | Prevotella_stercorea |
| otu19099 | Unclassified_Ruminococcaceae |
| otu25290 | Unclassified_Bacteroides |
| otu12458 | Unclassified_Bacteroides |
| otu51987 | Unclassified_Prevotella |
